# Supplementary material
Source: PubMed Central journal article supplement (PMC3166550)
Supplement: NIHMS285703-supplement-3.pdf [file NIHMS285703-supplement-3.pdf]

**Supplemental File 3. List of 281 DEGs identified for the D0-D18 contrast from both Amby\_001 and Amby\_002 at p-value < 0.1.**

| Gene Symbol | Probe Set ID Amby_001 | Probe Set ID Amby_002 | Mean Differential Expression Amby_001 | Mean Differential Expression Amby_001 | p-value Amby_001 | p-value Amby_002 |
|-------------|-----------------------|-----------------------|---------------------------------------|---------------------------------------|------------------|------------------|
| C22orf32    | axo00017-f            | SRV_05056             | -0.195313                             | -0.162760417                          | 0.08123757       | 0.03255          |
| FAM3B       | axo00300-f            | SRV_05110             | -0.093099333                          | -0.489908854                          | 0.04245924       | 0.01435          |
| S100A16     | axo00342-f            | SRV_05145             | 0.354166667                           | 0.325520833                           | 0.08898782       | 0.08850          |
| TRIM69      | axo00422-r            | SRV_05176             | -0.087890333                          | -0.185546875                          | 0.06164394       | 0.02898          |
| TMEM183A    | axo00726-f            | SRV_05211             | -0.319010333                          | -0.328776042                          | 0.05811318       | 0.00021          |
| CCDC43      | axo01010-r            | SRV_05272             | 0.306640333                           | 0.960286458                           | 0.02519231       | 0.04433          |
| DEGS1       | axo01122-f            | SRV_01936             | 0.205728667                           | 0.081054688                           | 0.02822686       | 0.04184          |
| HMGA1       | axo01322-r            | SRV_08603             | 0.886719333                           | 0.795572917                           | 0.00685215       | 0.00167          |
| GRPEL2      | axo01498-f            | SRV_04771             | -0.316731667                          | -0.260742188                          | 0.08148352       | 0.05763          |
| DNAJB13     | axo01854-r            | SRV_02815             | -0.333658667                          | -0.604817708                          | 0.05963297       | 0.05397          |
| PIGP        | axo01868-f            | SRV_03959             | -0.275390333                          | -0.31640625                           | 0.01477711       | 0.03281          |
| IDH3G       | axo02269-f            | SRV_02095             | -0.259765667                          | -0.346354167                          | 0.01933558       | 0.00913          |
| DMAP1       | axo02558-f            | SRV_07381             | -0.238932667                          | -0.270182292                          | 0.05520456       | 0.07330          |
| OGT         | axo02619-f            | SRV_05580             | -0.279296667                          | -0.134765625                          | 0.02850877       | 0.07338          |
| CENPV       | axo02633-f            | SRV_08376             | -0.807942333                          | -0.479166667                          | 0.01283518       | 0.00308          |
| UBE2E3      | axo02763-f            | SRV_05611             | -0.300781333                          | -0.2421875                            | 0.01606802       | 0.0022           |
| RBPM52      | axo02902-r            | SRV_03096             | -0.294922                             | -0.847005208                          | 0.00267559       | 0.02318          |
| EBAG9       | axo02978-r            | SRV_02112             | 0.154948                              | 0.13671875                            | 0.01641932       | 0.03370          |
| RPL7L1      | axo03075-f            | SRV_00590             | -0.299479                             | -0.350911458                          | 0.03247105       | 0.03555          |
| KIAA1967    | axo03248-r            | SRV_10311             | -0.420572667                          | -0.21484375                           | 0.04896057       | 0.01287          |
| SFT2D2      | axo03270-f            | SRV_05300             | -0.211588667                          | -0.368489583                          | 0.0464043        | 0.00727          |
| TEAD4       | axo03333-f            | SRV_01775             | -0.100260333                          | -0.430664063                          | 0.07563873       | 0.01854          |
| PPHLN1      | axo03336-r            | SRV_03973             | -0.257487                             | -0.244791667                          | 0.07003704       | 0.02884          |
| RBM12B      | axo03400-r            | SRV_05402             | 0.107421667                           | 0.057291667                           | 0.05678204       | 0.07220          |

|             |            |           |              |              |            |         |
|-------------|------------|-----------|--------------|--------------|------------|---------|
| SELS        | axo03419-r | SRV_04250 | -0.384765333 | -0.264973958 | 0.00675688 | 0.00064 |
| SGCB        | axo03736-f | SRV_10385 | -0.138671333 | -0.182291667 | 0.01546136 | 0.0901  |
| LOC10012827 | axo03880-f | SRV_09598 | -0.254231667 | -0.407877604 | 0.03034679 | 0.0426  |
| LIG1        | axo04151-r | SRV_00260 | -0.170247333 | -0.311197917 | 0.04474822 | 0.05759 |
| LFNG        | axo04220-f | SRV_05813 | -0.528645333 | -0.402994792 | 0.00050629 | 0.00431 |
| SLC7A3      | axo04425-f | SRV_04996 | 0.46875      | 0.421875     | 0.01283853 | 0.0011  |
| C5orf43     | axo04442-r | SRV_10088 | 0.340169333  | 0.251302083  | 0.0450002  | 0.00190 |
| ALDOB       | axo04828-r | SRV_00129 | -0.685872333 | -0.673177083 | 0.05946256 | 0.03148 |
| CTNND1      | axo04881-f | SRV_00863 | -0.257161333 | -0.305338542 | 0.06245157 | 0.06774 |
| ENTPD1      | axo04921-f | SRV_01177 | 0.145182333  | 0.250651042  | 0.05652385 | 0.01591 |
| CTNNB1      | axo04928-f | SRV_01237 | 0.146484     | 0.127604167  | 0.01045759 | 0.06043 |
| CHCHD4      | axo04941-r | SRV_05274 | 0.343424333  | 0.457682292  | 0.078972   | 0.00139 |
| C7orf25     | axo05077-r | SRV_04662 | 0.470703667  | 0.652018229  | 0.08430371 | 0.0461  |
| OSGIN2      | axo05485-f | SRV_02146 | 0.501953     | 0.552083333  | 0.0262508  | 0.03100 |
| BLMH        | axo05611-f | SRV_00321 | 0.945638     | 1.591796875  | 0.03548838 | 0.04100 |
| C4orf16     | axo05708-r | SRV_04275 | 0.672200667  | 0.580729167  | 0.00823414 | 0.01361 |
| VWA5A       | axo05823-f | SRV_03572 | -0.458984667 | -0.33203125  | 0.04808405 | 0.0609  |
| DNMT1       | axo05884-f | SRV_00888 | -0.924153667 | -0.7578125   | 0.00175451 | 0.00037 |
| ZCCHC9      | axo05940-f | SRV_04915 | 0.273763     | 0.192708333  | 0.03568472 | 0.09844 |
| FIP1L1      | axo06127-r | SRV_04808 | 0.344075     | 0.314453125  | 0.02580544 | 0.08348 |
| FERMT2      | axo06128-f | SRV_07505 | -0.410156333 | -0.333333333 | 0.04787464 | 0.02428 |
| C5orf24     | axo06188-f | SRV_05368 | 0.443359667  | 0.249348958  | 0.00239576 | 0.00741 |
| FDPS        | axo06252-f | SRV_01280 | 1.193685     | 1.018880208  | 0.00340832 | 0.0026  |
| AIMP1       | axo06426-f | SRV_02321 | -0.436198    | -0.237630208 | 0.00200072 | 0.04316 |
| GPT2        | axo06433-f | SRV_05191 | 0.322916333  | 0.2890625    | 0.04586511 | 0.07293 |
| LOC387787   | axo06645-r | SRV_07378 | 0.306640667  | 0.372721354  | 0.03244589 | 0.05924 |
| IMPA1       | axo06649-r | SRV_02574 | 0.256836333  | 0.133463542  | 0.06711961 | 0.01654 |
| SLC37A2     | axo06752-f | SRV_04309 | 0.161133     | 0.190755208  | 0.06580499 | 0.02599 |
| TEF         | axo06779-f | SRV_01777 | -0.225585667 | -0.282552083 | 0.09530652 | 0.02738 |

|         |            |           |              |              |            |         |
|---------|------------|-----------|--------------|--------------|------------|---------|
| CSDA    | axo06786-r | SRV_01926 | -0.169921667 | -0.216796875 | 0.00739799 | 0.05672 |
| MKI67   | axo06859-f | SRV_08476 | -0.374674333 | -0.653320312 | 0.04570646 | 0.04556 |
| ANXA4   | axo06934-f | SRV_00770 | -0.643229    | -0.47265625  | 0.01450486 | 0.06821 |
| ALDH7A1 | axo06990-r | SRV_00780 | 0.253906     | 0.252604167  | 0.04083155 | 0.02117 |
| EIF4G2  | axo07242-f | SRV_00931 | 0.288411333  | 0.212890625  | 0.00965163 | 0.00023 |
| FAAH    | axo07273-r | SRV_00949 | -0.558268333 | -0.583984375 | 0.0671486  | 0.09748 |
| GCLC    | axo07325-f | SRV_00966 | 0.436848667  | 0.337890625  | 0.01392253 | 0.03872 |
| DNAJA1  | axo07366-f | SRV_01028 | -0.141927333 | -0.082682292 | 0.09825518 | 0.08874 |
| EIF3E   | axo07386-r | SRV_01038 | -0.274739667 | -0.223958333 | 0.024213   | 0.09183 |
| ACTG1   | axo07409-r | SRV_01089 | -0.161458333 | -0.162760417 | 0.0739917  | 0.09541 |
| COL2A1  | axo07638-f | SRV_01205 | -0.355794333 | -0.337890625 | 0.06762163 | 0.07192 |
| SLC31A1 | axo07662-r | SRV_01215 | 0.397786667  | 0.40234375   | 0.02662002 | 0.06141 |
| CYC1    | axo07710-f | SRV_01246 | 0.280599     | 0.184895833  | 0.03903886 | 0.06291 |
| EIF4E   | axo07767-f | SRV_01264 | 0.319010333  | 0.2578125    | 0.01570413 | 0.03723 |
| FTH1    | axo07838-f | SRV_00167 | -0.414062333 | -0.447916667 | 0.09477894 | 0.04122 |
| GFAP    | axo07863-r | SRV_01304 | -0.434244333 | -0.331380208 | 0.03565715 | 0.06292 |
| IARS    | axo07952-f | SRV_03395 | 0.511393     | 0.427734375  | 0.01821295 | 0.02354 |
| MSI1    | axo08202-f | SRV_10183 | -0.374348667 | -0.514322917 | 0.00328335 | 0.00563 |
| NDUFB5  | axo08271-r | SRV_01456 | 0.179036667  | 0.143229167  | 0.02261545 | 0.05182 |
| NME3    | axo08287-f | SRV_10165 | -0.259765667 | -0.192057292 | 0.02123548 | 0.05955 |
| PDK2    | axo08363-r | SRV_01495 | -0.617512667 | -0.587239583 | 0.00495989 | 0.00400 |
| PGD     | axo08388-f | SRV_01504 | 0.692708     | 0.520833333  | 0.00125815 | 0.00302 |
| PIM1    | axo08403-f | SRV_01517 | -0.355143333 | -0.332682292 | 0.00936493 | 0.03799 |
| PPL     | axo08442-f | SRV_08086 | -0.333333333 | -0.396484375 | 0.00054697 | 0.04869 |
| PRPS1   | axo08496-r | SRV_01555 | 0.545572333  | 0.3046875    | 0.01329277 | 0.02405 |
| PSMA3   | axo08511-r | SRV_01565 | 0.260416667  | 0.248697917  | 0.01175473 | 0.02713 |
| PSMA7   | axo08514-f | SRV_01569 | 0.343099333  | 0.382161458  | 0.08536438 | 0.01226 |
| PSMB2   | axo08516-f | SRV_01570 | 0.422525667  | 0.36328125   | 0.03799382 | 0.00078 |
| PSMB5   | axo08522-f | SRV_01574 | 0.312499667  | 0.284505208  | 0.03064681 | 0.05932 |

|          |            |           |              |              |            |         |
|----------|------------|-----------|--------------|--------------|------------|---------|
| PSMB6    | axo08524-f | SRV_01575 | 0.217447667  | 0.243489583  | 0.04308497 | 0.07272 |
| PSMB7    | axo08526-f | SRV_01579 | 0.223958     | 0.221354167  | 0.03431458 | 0.02177 |
| PSMD2    | axo08536-f | SRV_01589 | 0.140624667  | 0.260416667  | 0.0210081  | 0.01445 |
| PSMD8    | axo08542-r | SRV_01596 | 0.304687667  | 0.2890625    | 0.010431   | 0.00388 |
| PSMD12   | axo08546-f | SRV_01603 | 0.44043      | 0.332682292  | 0.03906827 | 0.00720 |
| PSMD13   | axo08547-r | SRV_01607 | 0.334635667  | 0.341145833  | 0.00515675 | 0.01007 |
| PTX3     | axo08599-f | SRV_08179 | -0.118164333 | -1.087239583 | 0.0670586  | 0.02725 |
| RBM4     | axo08656-f | SRV_01645 | 0.082031     | 0.081380208  | 0.09088439 | 0.03482 |
| SFTPD    | axo08766-f | SRV_07632 | -0.760416667 | -0.623697917 | 0.03505881 | 0.09491 |
| SFTPD    | axo08767-f | SRV_01705 | 0.844401333  | 1.959960938  | 0.04422486 | 0.09192 |
| RPS6KB1  | axo08896-f | SRV_01756 | 0.311198     | 0.218424479  | 0.03731738 | 0.06160 |
| TPM2     | axo09018-f | SRV_05972 | 0.119140333  | 0.055664063  | 0.03007641 | 0.04445 |
| TPP2     | axo09020-f | SRV_01807 | 0.096028333  | 0.106770833  | 0.08024803 | 0.06600 |
| UBA1     | axo09065-f | SRV_01824 | -0.197916667 | -0.08984375  | 0.00540718 | 0.05080 |
| UBE2D2   | axo09071-r | SRV_01826 | 0.295573     | 0.220052083  | 0.02552447 | 0.00277 |
| VBP1     | axo09099-f | SRV_01854 | 0.292968667  | 0.19921875   | 0.00878755 | 0.01161 |
| VDAC1    | axo09104-f | SRV_07742 | 0.096354     | 0.0625       | 0.09784776 | 0.04885 |
| YWHAH    | axo09127-f | SRV_01866 | 0.501953333  | 0.465494792  | 0.00648681 | 0.00386 |
| PTP4A1   | axo09173-f | SRV_01876 | 0.230468667  | 0.10546875   | 0.00872081 | 0.06446 |
| HMGCR    | axo09309-f | SRV_08078 | 0.343099     | 0.252604167  | 0.02626454 | 0.02548 |
| COPS3    | axo09353-f | SRV_01929 | 0.347656333  | 0.205729167  | 0.01234901 | 0.00010 |
| PPAP2B   | axo09409-f | SRV_05535 | -0.500651    | -0.411458333 | 0.0252766  | 0.00690 |
| EIF4EBP3 | axo09428-f | SRV_01958 | -0.766276    | -1.18359375  | 0.0064109  | 0.00749 |
| EIF3F    | axo09465-f | SRV_01967 | -0.301432    | -0.201822917 | 0.05134702 | 0.01983 |
| PEA15    | axo09481-f | SRV_01974 | 0.444336     | 0.625976563  | 0.01063615 | 0.00857 |
| NR3C2    | axo09607-f | SRV_00540 | 0.550781333  | 1.350911458  | 4.53E-05   | 0.00472 |
| ATIC     | axo09727-f | SRV_02052 | -0.659505667 | -0.569661458 | 0.0002788  | 0.01570 |
| 15-Sep   | axo09892-r | SRV_02130 | 0.225911333  | 0.169270833  | 0.0920883  | 0.02554 |
| EEF1E1   | axo09909-f | SRV_02132 | 0.487630333  | 0.371744792  | 0.00613125 | 0.02527 |

|         |            |           |              |              |            |         |
|---------|------------|-----------|--------------|--------------|------------|---------|
| GDA     | axo09923-r | SRV_02137 | 0.481770667  | 1.027994792  | 0.03387312 | 0.01140 |
| COPA    | axo10010-f | SRV_02164 | 0.286458333  | 0.263020833  | 0.08955808 | 0.05345 |
| DDX10   | axo10040-f | SRV_02187 | -0.249999667 | -0.141601563 | 0.03546274 | 0.01745 |
| PRIM1   | axo10085-r | SRV_00559 | -0.596029    | -0.702799479 | 0.0027809  | 0.02137 |
| NARS    | axo10181-r | SRV_02247 | 0.293294333  | 0.36328125   | 0.04472387 | 0.00439 |
| NDUFB10 | axo10209-r | SRV_02252 | 0.192708333  | 0.129557292  | 0.08518845 | 0.07344 |
| RAB11A  | axo10321-f | SRV_02290 | 0.515950667  | 0.094401042  | 0.08592509 | 0.07098 |
| ETF1    | axo10395-f | SRV_02310 | 0.666341333  | 0.614583333  | 0.00644165 | 0.00087 |
| BAG4    | axo10546-f | SRV_07204 | 0.188476667  | 0.045572917  | 0.0458669  | 0.02292 |
| CCNC    | axo10873-f | SRV_10248 | 0.248046667  | 0.725911458  | 0.04707259 | 0.01696 |
| HSPA5   | axo11000-f | SRV_02516 | 0.910156667  | 1.044921875  | 0.05033055 | 0.07185 |
| HSPG2   | axo11164-f | SRV_10155 | -0.438151    | -0.47265625  | 0.00853426 | 0.01845 |
| IDH3A   | axo11167-f | SRV_02573 | 0.358073     | 0.297526042  | 0.01265516 | 0.00034 |
| DNM1L   | axo11295-f | SRV_03240 | 0.170572667  | 0.162760417  | 0.09536259 | 0.06598 |
| SAP18   | axo11465-f | SRV_02704 | 0.228516     | 0.047526042  | 0.05679894 | 0.04160 |
| EIF1B   | axo11469-r | SRV_02707 | 0.169271     | 0.125651042  | 0.00904637 | 0.05914 |
| S100A2  | axo11587-f | SRV_02216 | -0.930664333 | -1.893554688 | 0.03951517 | 0.02259 |
| TUBA1A  | axo11614-r | SRV_02754 | 0.281249667  | 0.204427083  | 0.04096736 | 0.00788 |
| MANF    | axo11615-f | SRV_02761 | 0.539062667  | 0.513671875  | 0.03286183 | 0.04876 |
| PIM3    | axo11749-r | SRV_08097 | 0.736002667  | 0.517578125  | 0.0125973  | 0.03501 |
| NFYB    | axo11779-f | SRV_02820 | 0.328125     | 0.227213542  | 0.01902424 | 0.01755 |
| RAD21   | axo11885-f | SRV_10294 | -0.249349    | -0.250651042 | 0.08793171 | 0.00263 |
| SSR4    | axo11906-f | SRV_02862 | -0.305338    | -0.28125     | 0.00441279 | 0.00201 |
| APPBP2  | axo12018-r | SRV_10071 | 0.320963333  | 0.192057292  | 0.07422041 | 0.02184 |
| ANP32B  | axo12040-f | SRV_09739 | -0.252604    | -0.232421875 | 0.01833558 | 0.05530 |
| AGR2    | axo12049-f | SRV_02912 | -1.392904    | -1.6875      | 0.0791857  | 0.04986 |
| MTHFD2  | axo12280-f | SRV_03007 | -0.216145667 | -0.252604167 | 0.01199035 | 0.02468 |
| RUVBL2  | axo12306-f | SRV_03011 | -0.122070333 | -0.247395833 | 0.04831204 | 0.01715 |
| COPS8   | axo12340-f | SRV_03026 | 0.325521     | 0.152994792  | 0.00232356 | 0.04988 |

|          |            |           |              |              |            |         |
|----------|------------|-----------|--------------|--------------|------------|---------|
| UGP2     | axo12386-f | SRV_03049 | -0.220377333 | -0.3984375   | 0.04457263 | 0.01033 |
| YWHAE    | axo12391-f | SRV_10365 | 0.096354333  | 0.087239583  | 0.015538   | 0.00586 |
| CCNI     | axo12477-r | SRV_03086 | -0.403645667 | -0.321614583 | 0.04226659 | 0.01460 |
| RNF113A  | axo12598-r | SRV_03126 | -0.461588333 | -0.583007813 | 0.01754434 | 0.00662 |
| PWP1     | axo12667-r | SRV_03144 | -0.544921333 | -0.529296875 | 0.0501444  | 0.08015 |
| CHP      | axo12810-f | SRV_05719 | 0.157552333  | 0.115234375  | 0.01708842 | 0.04202 |
| VPS45    | axo12821-r | SRV_08683 | 0.337565333  | 0.154947917  | 0.00499164 | 0.0277  |
| TARDBP   | axo12912-f | SRV_03236 | 0.204426333  | 0.4375       | 0.06929974 | 0.06417 |
| TARDBP   | axo12913-f | SRV_03237 | 0.089192333  | 0.1484375    | 0.07448593 | 0.02783 |
| AHSA1    | axo12959-f | SRV_07996 | 0.661458667  | 0.4140625    | 0.00382876 | 0.02001 |
| AATF     | axo12973-r | SRV_03261 | -0.189127333 | -0.2109375   | 0.07710948 | 0.09078 |
| XRN2     | axo13051-f | SRV_03286 | -0.286458333 | -0.272786458 | 0.02792322 | 0.02644 |
| HBP1     | axo13054-f | SRV_09933 | -0.501953333 | -0.475585937 | 0.00606265 | 0.00245 |
| G3BP2    | axo13089-r | SRV_06722 | 0.226237     | 0.30859375   | 0.02953402 | 0.01298 |
| MAPRE1   | axo13129-f | SRV_03310 | 0.105469     | 0.145182292  | 0.01538897 | 0.06336 |
| SF3B1    | axo13219-f | SRV_03336 | -0.244140667 | -0.12890625  | 0.01350686 | 0.03879 |
| MYLPF    | axo13329-f | SRV_03368 | -0.483398    | -0.526367188 | 0.01945141 | 0.06340 |
| PYCR2    | axo13361-f | SRV_09240 | -0.334635333 | -0.259765625 | 0.055378   | 0.03210 |
| ALG5     | axo13365-f | SRV_03374 | 0.171224333  | 0.294596354  | 0.00371405 | 0.03206 |
| MKRN1    | axo13408-f | SRV_03404 | 0.170898333  | 0.264322917  | 0.05697808 | 0.01647 |
| NDUFAF4  | axo13523-r | SRV_04412 | 0.401693     | 0.55078125   | 0.02623113 | 0.06339 |
| ETHE1    | axo13643-f | SRV_03496 | -0.338867333 | -0.712239583 | 0.02620025 | 0.01878 |
| C22orf28 | axo13650-r | SRV_03501 | 0.159505     | 0.192708333  | 0.06197269 | 0.04655 |
| MTCH2    | axo13679-f | SRV_03514 | -0.239583    | -0.309244792 | 0.09014889 | 0.00424 |
| CACYBP   | axo13752-r | SRV_09258 | -0.207682    | -0.203776042 | 0.02991957 | 0.00472 |
| PDCD4    | axo13782-r | SRV_03540 | -0.225260333 | -0.162760417 | 0.06050843 | 0.01300 |
| ZNF330   | axo13813-f | SRV_03550 | 0.246745     | 0.303385417  | 0.0413908  | 0.01446 |
| ERO1L    | axo13866-f | SRV_03562 | 0.386068     | 0.576171875  | 0.05937629 | 0.00056 |
| LAPTM4A  | axo14032-f | SRV_03585 | -0.088541333 | -0.115234375 | 0.09214375 | 0.05359 |

|          |            |           |              |              |            |         |
|----------|------------|-----------|--------------|--------------|------------|---------|
| MTSS1    | axo14063-f | SRV_03594 | 0.225586     | 0.36328125   | 0.01934234 | 0.08744 |
| KIAA0174 | axo14080-r | SRV_07966 | -0.166015667 | -0.114583333 | 0.01720266 | 0.0603  |
| TOMM70A  | axo14142-r | SRV_03611 | 0.267903333  | 0.108072917  | 0.03486636 | 0.01110 |
| KIAA0020 | axo14208-f | SRV_03626 | -0.556966    | -0.513671875 | 0.01815824 | 0.00696 |
| KIAA0831 | axo14255-f | SRV_07537 | -0.197916333 | -0.380208333 | 0.0227982  | 0.02208 |
| ERP44    | axo14458-r | SRV_02375 | 0.13737      | 0.173828125  | 0.02189158 | 0.06058 |
| OTUD3    | axo14749-f | SRV_09177 | 0.158854333  | 0.283203125  | 0.02467154 | 0.00845 |
| SYF2     | axo15070-f | SRV_03721 | -0.459635667 | -0.423177083 | 0.07490945 | 0.06785 |
| LSM14A   | axo15149-f | SRV_03731 | -0.195963667 | -0.141276042 | 0.09636229 | 0.06539 |
| C1orf77  | axo15163-f | SRV_03738 | 0.277994667  | 0.251953125  | 0.02484188 | 0.03992 |
| ZNF593   | axo15294-f | SRV_03769 | -0.677734333 | -0.984700521 | 0.00531884 | 0.01670 |
| MRPS7    | axo15395-r | SRV_03800 | -0.612304667 | -0.603515625 | 0.05940727 | 0.03309 |
| METTL9   | axo15448-r | SRV_03825 | 0.272135333  | 0.28125      | 0.07037313 | 0.07591 |
| SBDS     | axo15460-f | SRV_03830 | -0.427734333 | -0.352864583 | 0.00585231 | 0.00968 |
| DERL2    | axo15463-r | SRV_03833 | 0.264323     | 0.209635417  | 0.04515967 | 0.05900 |
| FIS1     | axo15488-r | SRV_03847 | -0.371093667 | -0.295572917 | 0.04527804 | 0.00682 |
| PTRH2    | axo15499-f | SRV_07905 | 0.198568     | 0.2734375    | 0.04368655 | 0.08881 |
| CHCHD2   | axo15558-f | SRV_03886 | 0.327474     | 0.227213542  | 0.03705908 | 0.01210 |
| HN1      | axo15596-f | SRV_03899 | 0.384765333  | 0.32421875   | 0.05702346 | 0.0245  |
| VPS28    | axo15609-f | SRV_03905 | 0.236328     | 0.111979167  | 0.00341558 | 0.04387 |
| HP1BP3   | axo15685-r | SRV_08659 | -0.160156    | -0.21875     | 0.03078806 | 0.00483 |
| TRAP1    | axo15687-f | SRV_03927 | 0.429362     | 0.315104167  | 0.00502285 | 0.00649 |
| DNAJB11  | axo15702-r | SRV_03933 | 0.772135667  | 0.5859375    | 0.00049005 | 0.02499 |
| CMPK1    | axo15703-f | SRV_03934 | 0.659505667  | 0.604817708  | 0.08402393 | 0.08292 |
| C20orf43 | axo15777-f | SRV_03956 | -0.326172    | -0.206380208 | 0.03616439 | 0.00955 |
| MRPL51   | axo15829-f | SRV_03979 | -0.190104    | -0.125651042 | 0.09591845 | 0.09140 |
| PPP2CB   | axo15886-r | SRV_02100 | 0.188151     | 0.134114583  | 0.00819275 | 0.00242 |
| WDR1     | axo15995-f | SRV_09889 | 0.137369667  | 0.083984375  | 0.00524305 | 0.08180 |
| PNRC2    | axo16241-r | SRV_06043 | -0.434244667 | -0.402994792 | 0.0029709  | 0.06178 |

|          |            |           |              |              |            |         |
|----------|------------|-----------|--------------|--------------|------------|---------|
| LRRC40   | axo16244-r | SRV_04069 | 0.53418      | 0.561197917  | 0.01370268 | 0.09124 |
| CDKAL1   | axo16248-f | SRV_04071 | -0.376627333 | -0.376953125 | 0.00479312 | 0.04827 |
| C20orf11 | axo16379-f | SRV_04102 | 0.180013     | 0.188151042  | 0.03091308 | 0.03475 |
| NPLOC4   | axo16403-f | SRV_04109 | 0.334310333  | 0.337890625  | 0.06573488 | 0.04386 |
| TTC38    | axo16414-r | SRV_04112 | -0.138021    | -0.220377604 | 0.07911091 | 0.06636 |
| INTS10   | axo16619-f | SRV_04168 | 0.479166667  | 0.820963542  | 0.07377643 | 0.06508 |
| ATF7IP   | axo16656-f | SRV_08824 | -0.237956    | -0.196289063 | 0.05920906 | 0.0966  |
| TMEM63B  | axo16905-r | SRV_06464 | 0.198893333  | 0.235677083  | 0.01375015 | 0.00579 |
| C20orf24 | axo17058-f | SRV_04293 | 0.264974     | 0.276041667  | 0.09064379 | 0.06910 |
| U2AF2    | axo17344-r | SRV_03215 | -0.199218667 | -0.118489583 | 0.03008902 | 0.09107 |
| GAMT     | axo17374-r | SRV_00169 | -0.618489667 | -0.617838542 | 0.01543318 | 0.02758 |
| CIAPIN1  | axo17463-f | SRV_04410 | -0.217447667 | -0.171223958 | 0.07204481 | 0.09308 |
| XPNPEP1  | axo17531-f | SRV_04417 | 0.169922     | 0.2265625    | 0.04884782 | 0.00856 |
| SLC3A2   | axo17762-f | SRV_10177 | -0.507161333 | -0.466796875 | 0.07019066 | 0.08431 |
| ARHGAP21 | axo17776-f | SRV_04464 | 0.116862333  | 0.094401042  | 0.08967951 | 0.01638 |
| LRRN1    | axo17826-f | SRV_04466 | 0.160807667  | 0.059244792  | 0.05834988 | 0.09194 |
| C6orf115 | axo18117-r | SRV_05942 | 0.261067667  | 0.12109375   | 0.00937577 | 0.03422 |
| CARS     | axo18314-f | SRV_01165 | 0.242187333  | 0.469401042  | 0.06680574 | 0.06710 |
| LHPP     | axo18324-r | SRV_04596 | -0.260091    | -0.588541667 | 0.00438925 | 0.06771 |
| MLF1     | axo18390-r | SRV_04611 | -0.279296667 | -0.592447917 | 0.03525505 | 0.00155 |
| RFWD2    | axo18400-f | SRV_09705 | -0.491211    | -0.479817708 | 0.02961615 | 0.04251 |
| WDR18    | axo18716-f | SRV_04677 | -0.379557667 | -0.334635417 | 0.06404376 | 0.02459 |
| WDR77    | axo18717-r | SRV_04678 | 0.504882667  | 0.561197917  | 0.04766649 | 0.05009 |
| NKAP     | axo18794-r | SRV_04695 | -0.205729    | -0.205078125 | 0.07526636 | 0.01734 |
| AKIRIN1  | axo18852-f | SRV_04706 | 0.238281     | 0.178385417  | 0.07863371 | 0.00097 |
| HECTD3   | axo18860-f | SRV_05712 | 0.161458333  | 0.229817708  | 0.0750265  | 0.00083 |
| SFRS14   | axo18869-f | SRV_06410 | -0.397787    | -0.350260417 | 0.00424865 | 0.00690 |
| SNIP1    | axo18975-f | SRV_10154 | 0.341145667  | 0.3671875    | 0.04126285 | 0.02196 |
| CCDC58   | axo19209-r | SRV_07717 | 0.416666333  | 0.311848958  | 0.02490136 | 0.05496 |



|            |            |           |              |              |            |         |
|------------|------------|-----------|--------------|--------------|------------|---------|
| MRPL9      | axo19573-f | SRV_04854 | -0.574544    | -0.502604167 | 0.00049287 | 0.00686 |
| FAM107B    | axo19597-f | SRV_10157 | -0.307942667 | -0.553059896 | 0.0303495  | 0.02141 |
| EIF1AD     | axo19876-f | SRV_04925 | -0.301107    | -0.541015625 | 0.0199313  | 0.00481 |
| C16orf13   | axo19901-f | SRV_10010 | -0.090169333 | -0.166015625 | 0.07401244 | 0.03491 |
| TUBB6      | axo20006-r | SRV_04964 | 0.642253     | 0.649739583  | 0.01307197 | 0.02677 |
| RTN4IP1    | axo20081-r | SRV_04987 | 0.434895667  | 0.728841146  | 0.03993093 | 0.06700 |
| CBR4       | axo20097-f | SRV_04992 | -0.27181     | -0.360026042 | 0.03056101 | 0.00072 |
| MFSD5      | axo20188-f | SRV_05011 | -0.136718667 | -0.246744792 | 0.00892309 | 0.03023 |
| PIGS       | axo20319-r | SRV_05052 | -0.481119333 | -0.333984375 | 0.01378815 | 0.07001 |
| BTBD6      | axo20333-r | SRV_05054 | -0.213867333 | -0.422526042 | 0.01830143 | 0.00256 |
| CDKN1C     | axo20346-f | SRV_00140 | 0.802083333  | 0.658854167  | 0.00182152 | 0.00026 |
| unknown    | axo20448-f | SRV_00614 | -0.152343667 | -0.146484375 | 0.08246489 | 0.00889 |
| RPS29      | axo20469-f | SRV_00702 | -0.143880667 | -0.255859375 | 0.01076101 | 0.00458 |
| FUBP1      | axo20727-f | SRV_02010 | -0.296223667 | -0.282552083 | 0.02845711 | 0.04556 |
| MRPL42     | axo21016-f | SRV_03428 | -0.214843667 | -0.251302083 | 0.07223855 | 0.00764 |
| GADD45B    | axo21092-f | SRV_03753 | 0.235026333  | 0.14453125   | 0.01420152 | 0.06904 |
| HIATL1     | axo21334-f | SRV_04965 | 0.299479     | 0.302083333  | 0.00857332 | 0.01054 |
| unknown    | axo21620-f | SRV_06632 | 0.321940333  | 0.268554688  | 0.03691965 | 0.01563 |
| unknown    | axo22261-f | SRV_08799 | -0.931966    | -1.202148438 | 0.06787385 | 0.05980 |
| unknown    | axo23440-r | SRV_09154 | 0.199218333  | 0.243815104  | 0.03880173 | 0.04111 |
| unknown    | axo23634-f | SRV_06743 | -0.145182333 | -0.264648438 | 0.0503144  | 0.07048 |
| GADD45GIP1 | axo24328-r | SRV_05073 | 0.258463333  | 0.303385417  | 0.02961626 | 0.02364 |
| unknown    | axo24354-r | SRV_07803 | -0.544596333 | -0.653645833 | 0.05617067 | 0.07507 |
| unknown    | axo25250-f | SRV_08721 | 0.423177333  | 0.526041667  | 0.07164525 | 7.72E-  |
| unknown    | axo25549-f | SRV_10198 | -0.303385667 | -0.339192708 | 0.02025042 | 0.00300 |
| unknown    | axo25972-f | SRV_09703 | -0.233724    | -0.298177083 | 0.04470127 | 0.02048 |
| unknown    | axo26184-f | SRV_07408 | -0.180664    | -0.097981771 | 0.00114548 | 0.08002 |
| unknown    | axo27303-f | SRV_08960 | 0.119466333  | 0.105794271  | 0.06462215 | 0.08449 |
| unknown    | axo27641-f | SRV_06422 | -0.393229333 | -0.309895833 | 0.05983734 | 0.02371 |

|         |            |           |              |              |            |         |
|---------|------------|-----------|--------------|--------------|------------|---------|
| unknown | axo27878-f | SRV_10142 | 0.201171667  | 0.233723958  | 0.03084739 | 0.00170 |
| unknown | axo28139-f | SRV_06667 | -0.163737    | -0.147135417 | 0.05601632 | 0.01300 |
| unknown | axo28231-f | SRV_08712 | 0.161783667  | 0.545247396  | 0.0552456  | 0.00808 |
| unknown | axo28339-f | SRV_08751 | 0.233073     | 0.111979167  | 0.02119738 | 0.06295 |
| unknown | axo29132-f | SRV_10026 | 0.540364667  | 0.243164063  | 0.01452654 | 0.09001 |
| unknown | axo29395-f | SRV_09160 | -0.231445333 | -0.264973958 | 0.04130799 | 0.04300 |
| unknown | axo29789-f | SRV_05710 | 1.374349     | 2.113932292  | 0.00208113 | 0.01190 |
| unknown | axo30045-f | SRV_07800 | -0.207031333 | -0.166666667 | 0.0977039  | 0.00117 |
| unknown | axo30287-f | SRV_05733 | -0.268880667 | -0.393229167 | 0.02347267 | 0.01242 |
| unknown | axo30766-f | SRV_09824 | 0.10319      | 0.056640625  | 0.02802166 | 0.09447 |
| unknown | axo31258-f | SRV_09942 | -0.385742    | -0.333984375 | 0.01049811 | 0.03876 |
| unknown | axo31309-f | SRV_04478 | -0.368489667 | -0.267252604 | 0.066827   | 0.01116 |
| unknown | axo31320-f | SRV_05709 | 2.098958667  | 1.983072917  | 0.00927633 | 0.00812 |
| unknown | axo31481-f | SRV_08851 | -0.235025667 | -0.32421875  | 0.06056079 | 0.08408 |
| unknown | axo31491-f | SRV_09083 | -0.220703333 | -0.319010417 | 0.016747   | 0.02408 |
| unknown | axo31504-f | SRV_09334 | 0.235677     | 0.219401042  | 0.05024618 | 0.09615 |
| unknown | axo31523-f | SRV_09570 | -0.852864333 | -1.01953125  | 0.01635516 | 0.01715 |
| unknown | axo31546-f | SRV_09869 | -1.032552    | -0.962890625 | 0.02275243 | 0.09110 |
| unknown | axo31566-f | SRV_10202 | 0.532877667  | 0.536783854  | 0.01455763 | 0.01290 |
| unknown | axo31574-f | SRV_10359 | 0.979818     | 0.917317708  | 0.09104573 | 0.04628 |
| unknown | axo31611-f | SRV_06859 | -0.566406333 | -0.477213542 | 0.02242705 | 0.01454 |
| unknown | axo31629-f | SRV_07847 | -0.744140667 | -0.577799479 | 0.02009628 | 0.01953 |
| unknown | axo31653-f | SRV_09319 | -0.452799667 | -0.516927083 | 0.0373843  | 0.02039 |
| unknown | axo31672-f | SRV_10397 | -0.231770667 | -0.280598958 | 0.01943473 | 0.00754 |
| unknown | axo31705-f | SRV_07067 | -0.676432333 | -0.610026042 | 0.06128228 | 0.03308 |
